# Supplementary material
Source: PubMed Central journal article supplement (PMC2933817)

# Figure S1

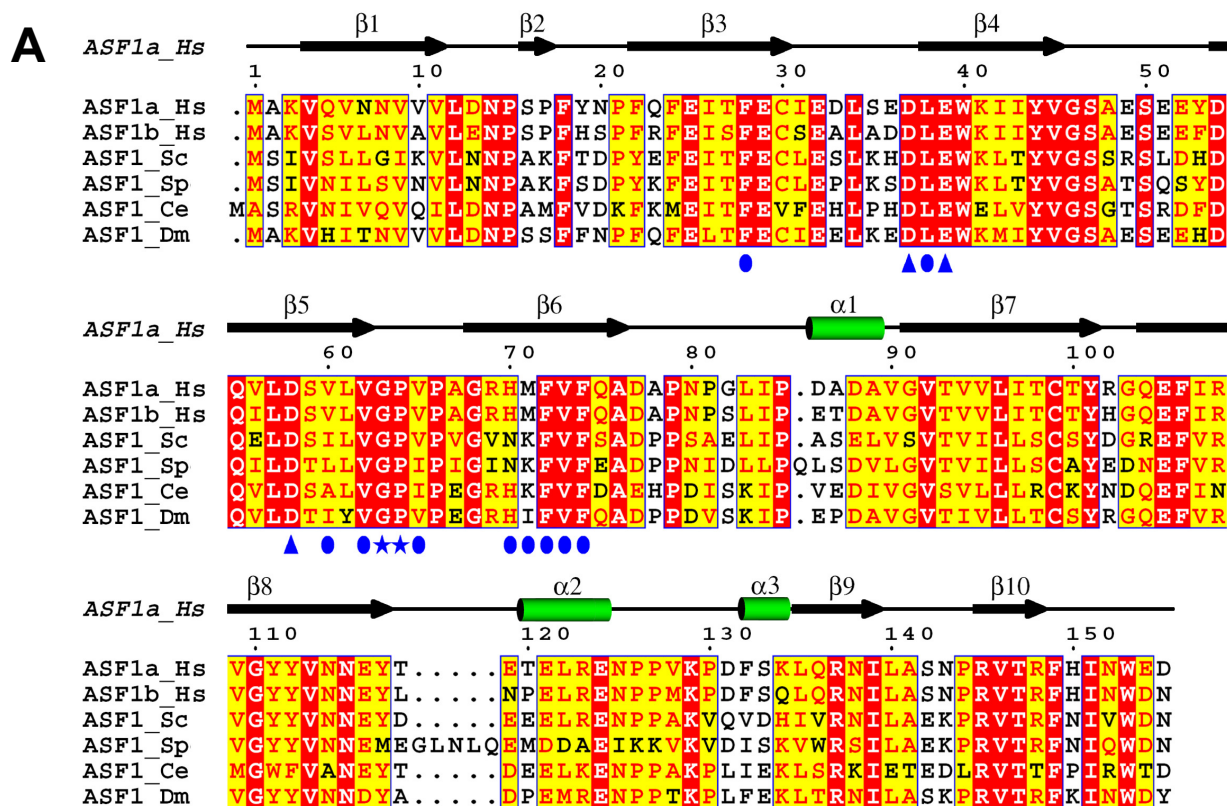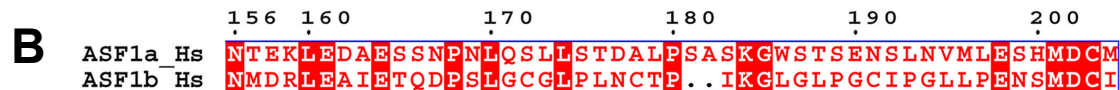

**Figure S2**

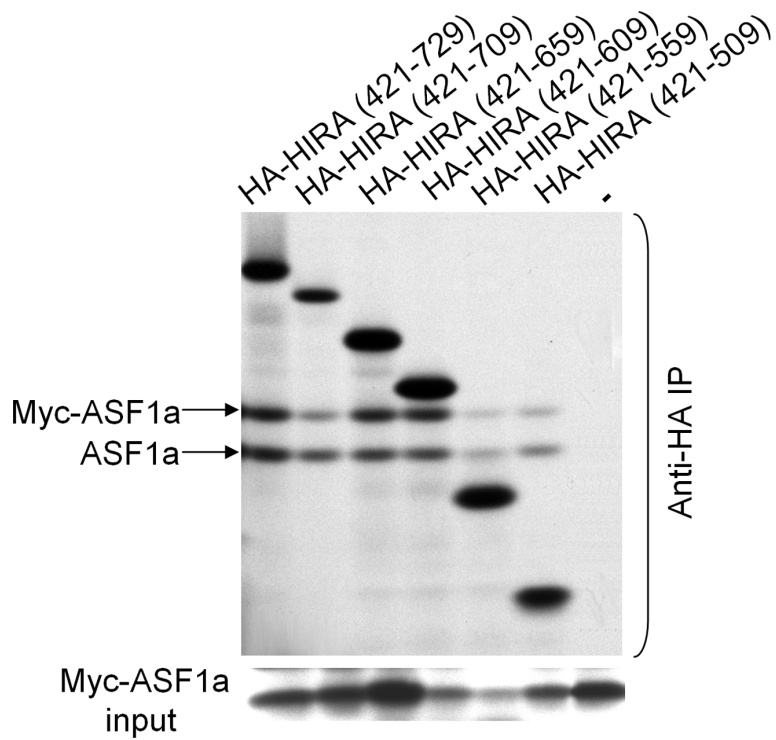

Supplement: NIHMS179259-supplement-01.pdf [file NIHMS179259-supplement-01.pdf]
